# Supplementary material
Source: publisher site journal article supplement (https://www.dovepress.com/article/224809)
Supplement: Supplementary file 1 [file get_supplementary_file.php]

**Supplementary Material**

**Supplementary table 1.** IPTW overall survival probability and disease-specific cumulative incidence at 1, 3, and 5 years, by treatment type*.

Notes: IPTW: inverse of probability treatment-weighted; RFA: Radiofrequency Ablation; SR: Surgical Resection; LT: Transplantation; *Survival probabilities were generated from an IPTW-Cox model with time-dependent treatment variable. Values are percentages (95% CIs)

**Supplementary table 2.** Instrumental variable adjusted overall survival for early and very early stage hepatocellular carcinoma.

**Supplementary table 3.** Prognostic risk factors associated with overall survival by univariate and multivariate analysis.

**Supplementary table 1.** IPTW overall survival probability and disease-specific cumulative incidence at 1, 3, and 5 years, by treatment type*.

| Variable | Survival probability and disease-specific cumulative incidence for RFA-SR-LT IPTW cohorts | | |
| --- | --- | --- | --- |
| **RFA** | **SR** | **LT** |
| **Overall survival** | | | |
| 1-year | 87 (82, 92) | 91 (87, 93) | 89 (85, 94) |
| 3-year | 62 (56, 69) | 64 (58, 71) | 75 (69, 81) |
| 5-year | 53 (46, 62) | 52 (45, 60) | 66 (59, 74) |
| **Disease-specific cumulative incidence** | | | |
| 1-year | 9.4 (8.3, 10.7) | 7.2 (6.2, 8.4) | 2.6 (2.0, 3.2) |
| 3-year | 29.8 (27.8, 31.9) | 19.4 (17.7, 21.2) | 8.7 (7.6, 9.9) |
| 5-year | 40.7 (38.3, 43.1) | 28.2 (26.0, 30.3) | 12.5 (11.1, 14.0) |

Notes: IPTW: inverse of probability treatment-weighted; RFA: Radiofrequency Ablation; SR: Surgical Resection; LT: Transplantation; *Survival probabilities were generated from an IPTW-Cox model with time-dependent treatment variable. Values are percentages (95%CIs)

**Supplementary table 2.** Instrumental variable adjusted overall survival for early and very early stage hepatocellular carcinoma.

| Model and parameters | Hazard Ratio (95% CI) | P value | Instrumental F statistic | P value |
| --- | --- | --- | --- | --- |
| SR vs RFA | 0.9 (0.8, 1.0) | 0.003 | 137.27 | P<0.0001 |
| LT vs RFA | 0.7 (0.6, 0.8) | <0.001 | 15.16 | P=0.002 |
| LT vs SR | 0.7 (0.6, 0.9) | 0.006 | 70.24 | P<0.0001 |
| Notes: RFA: Radiofrequency Ablation; SR: Surgical Resection; LT: Transplantation | | | | |

**Supplementary table 3.** Prognostic risk factors associated with overall survival by univariate and multivariate analysis.

| **Parameters** | Univariate analysis | Multivariate analysis |
| --- | --- | --- |
| Treatment |  |  |
| RFA | 1.0 | 1.0 |
| SR | 0.6 (0.6, 0.6); P<0.001 | 0.7 (0.6, 0.8); P<0.001 |
| LT | 0.3 (0.3, 0.3); P<0.001 | 0.3 (0.2, 0.4); P<0.001 |
| Age | 1.0 (1.0, 1.0); P<0.001 | 1.0 (1.0, 1.0); P=0.224 |
| Sex |  |  |
| Female | 1.0 | 1.0 |
| Male | 1.0 (1.0, 1.1); P=0.265 | 1.1 (0.9, 1.3); P=0.495 |
| **Tumor grade** |  |  |
| Well differentiated | 1.0 | 1.0 |
| Moderately differentiated | 1.0 (0.9, 1.1); P=0.569 | 1.2 (1.0, 1.4); P=0.058 |
| Poorly differentiated | 1.4 (1.2, 1.6); P<0.001 | 1.6 (1.3, 2.1); P<0.001 |
| **Tumor size** |  |  |
| <20mm | 1.0 | 1.0 |
| 21-30 mm | 1.4 (1.2, 1.5); P<0.001 | 1.2 (0.9, 1.5); P=0.144 |
| 31-50 mm | 1.7 (1.5, 1.8); P<0.001 | 1.4 (1.1, 1.8); P=0.004 |
| 31-35 mm | 1.5 (1.3, 1.7); P<0.001 | 1.3 (1.0, 1.6); P=0.110 |
| Lymph nodes |  |  |
| No regional lymph node involvement | 1.0 | 1.0 |
| Regional lymph nodes | 1.6 (1.1, 2.2); P=0.014 | 2.0 (0.8, 5.0); P=0.113 |
| **AFP** |  |  |
| Negative/normal | 1.0 | 1.0 |
| Borderline/undetermined | 0.7 (0.3, 1.9); P=0.529 | 0.4 (0.1, 3.1); P=0.405 |
| Positive/elevated | 1.4 (1.3, 1.5); P<0.001 | 1.3 (1.1, 1.5); P=0.003 |
| **Fibrosis score** |  |  |
| F0 | 1.0 | 1.0 |
| F1 | 1.1 (0.9, 1.2); P=0.444 | 1.4 (1.2, 1.7); P<0.001 |
| Age group |  |  |
| <65 | 1.0 | 1.0 |
| >=65 | 1.8 (1.6, 1.9); P<0.001 | 1.2 (1.0, 1.6); P=0.114 |

Notes: RFA: Radiofrequency Ablation; SR: Surgical Resection; LT: Liver transplantation; Boldface type indicates P<0.05.
